# Supplementary material
Source: HighWire-hosted journal article supplement (https://egastroenterology.bmj.com/content/3/1/e100145)

Supplemental 1

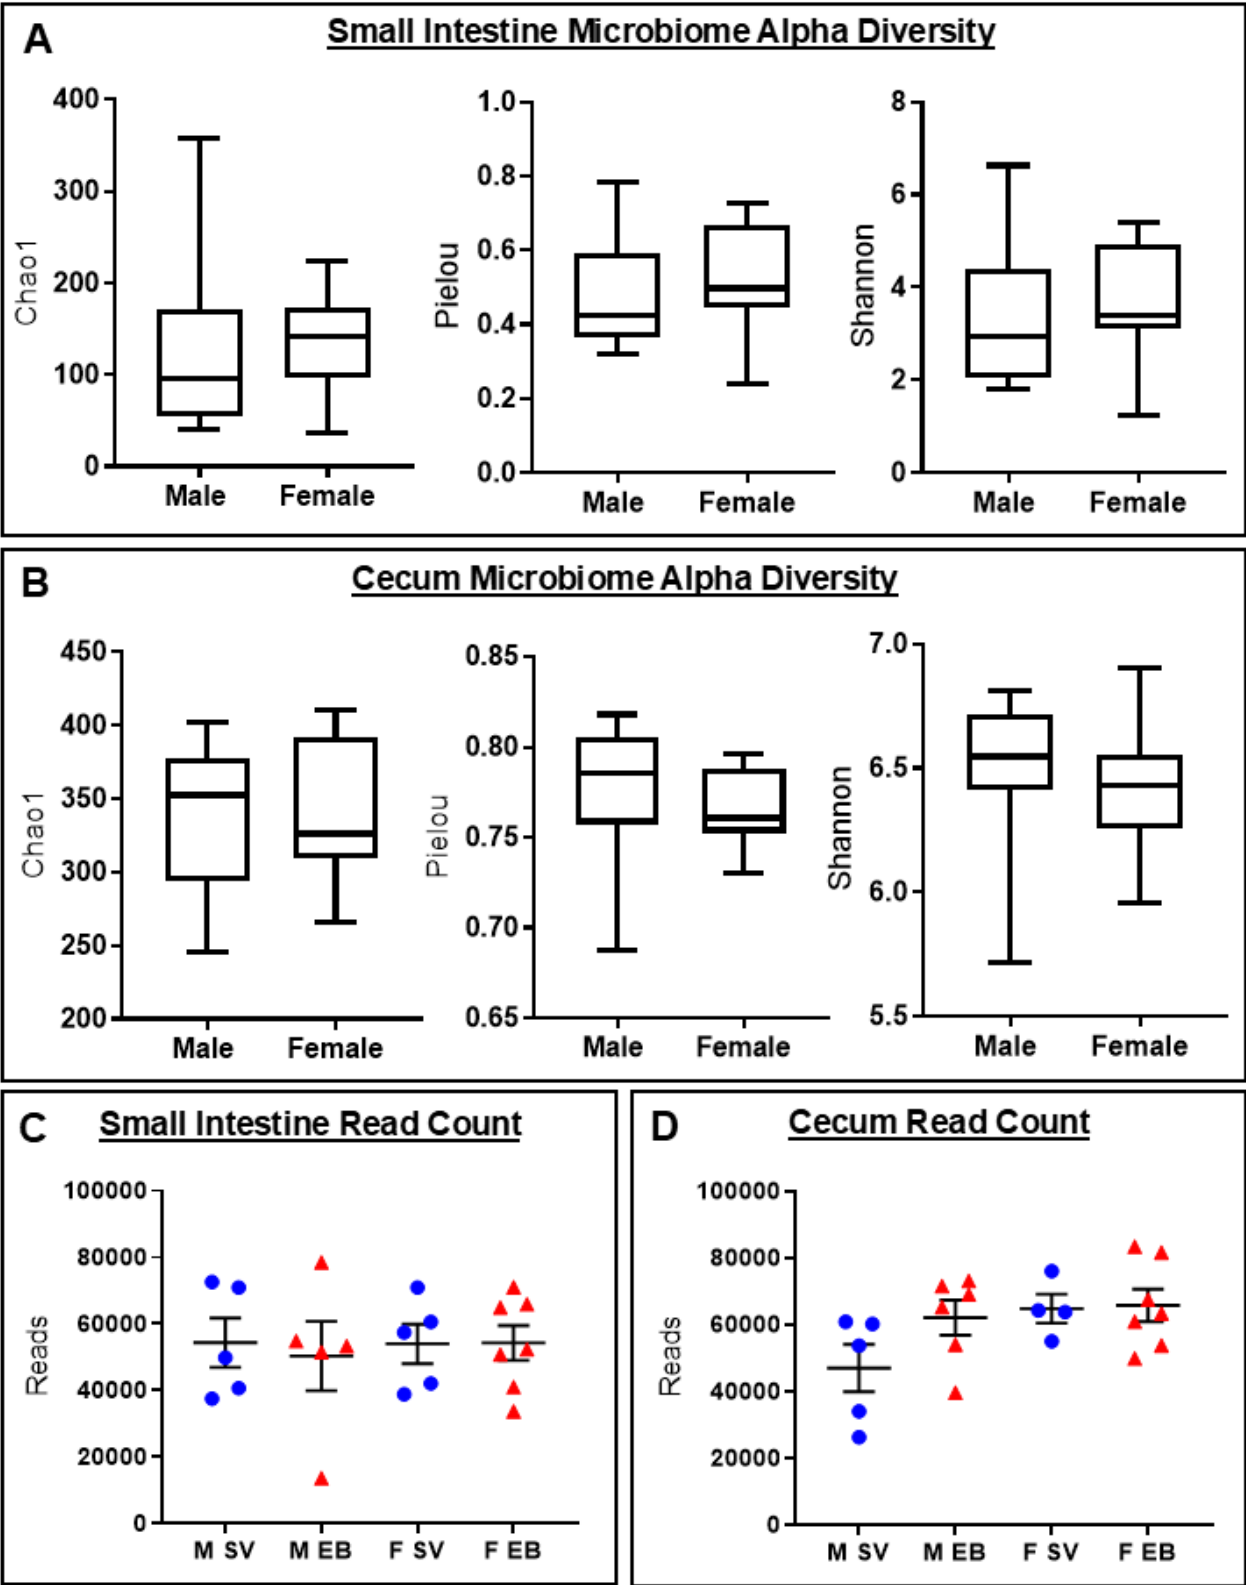

Supplement: inline-supplementary-material-1 [file inline-supplementary-material-1.pdf]
